# Supplementary material for: Two cooperative binding sites sensitize PI(4,5)P2 recognition by the tubby domain
Source: PubMed Central journal article supplement — Sci Adv. 2022 Sep 7;8(36):eabp9471. doi: 10.1126/sciadv.abp9471 (PMC9451155; doi:10.1126/sciadv.abp9471), 2022-09-07
Supplement: sciadv.abp9471_sm.pdf [file sciadv.abp9471_sm.pdf]

Supplementary Materials for  
**Two cooperative binding sites sensitize PI(4,5)P<sub>2</sub> recognition by the  
tubby domain**

Veronika Thallmair *et al.*

Corresponding author: Sebastian Thallmair, thallmair@fias.uni-frankfurt.de;  
Dominik Oliver, oliverd@staff.uni-marburg.de

*Sci. Adv.* **8**, eabp9471 (2022)  
DOI: 10.1126/sciadv.abp9471

**This PDF file includes:**

Supplementary Text  
Figs. S1 to S12  
Tables S1 to S3

## Supplementary Text

### Open-beta Martini 3 models for PI(4,5)P<sub>2</sub> and PI(4)P

The coarse-grained (CG) models for the phosphoinositols PI(4,5)P<sub>2</sub> and PI(4)P were built based on the refined models for Martini 2 (ref. 27 of the main text). While the bonded terms were kept unchanged, the bead type was adapted to the open-beta version of Martini 3. Table S1 lists the old (Martini 2) and new (open-beta Martini 3) bead types. Note that the bead types of the open-beta version are not identical with the final release of Martini 3 (ref. 21, 22 of the main text). The itp files in Gromacs format are publicly available within the Zenodo dataset associated with the article (doi: 10.5281/zenodo.6587156).

### Comparison of tubbyCT crystal structure with modeled structures

To generate the CG model for tubbyCT, the missing loops were modeled using the I-TASSER server (50). Fig. S4a depicts the crystal structure (pdb code 1I7E) together with the modeled structure from I-TASSER as well as a more recent structure obtained by AlphaFold. Both modeled structures match well with the overall protein fold of the crystal structure. The residues which were not resolved in the crystal structure show some deviations between both models. The missing loop (residues 304–309) which includes parts of the novel PI(4,5)P<sub>2</sub> binding site is highlighted by the orange circle (Fig. S4a).

Fig. S4b shows a more detailed view on this loop including the side chain orientations of the five consecutive positively charged residues 301–305. While the orientation of the first two residues matches well with the crystal structure for both models, the third one deviates from it for both models. The last two residues (304, 305) are not present in the crystal structure and while the orientation of K304 agrees for models, the orientation of K305 deviates from each other in both models.

### RMSF comparison of membrane-bound and free tubbyCT

Fig. S5a shows the comparison of the backbone root mean square fluctuations (RMSF) of membrane-bound and free tubbyCT. While most regions of the protein do not show significant differences in RMSF, three loops between residues 300–340 show reduced flexibility upon membrane binding of  $\Delta\text{RMSF} \approx -0.1$  nm. The first loop contains the novel binding site and indicates that PI(4,5)P<sub>2</sub> binding reduces the flexibility of the loop. Fig. S5(b) shows the structure of tubbyCT colored according to the RMSF difference between membrane-bound and free tubbyCT. It can be clearly recognized that the three loops are all on the same face of the protein. It is the face which is in contact with the membrane.

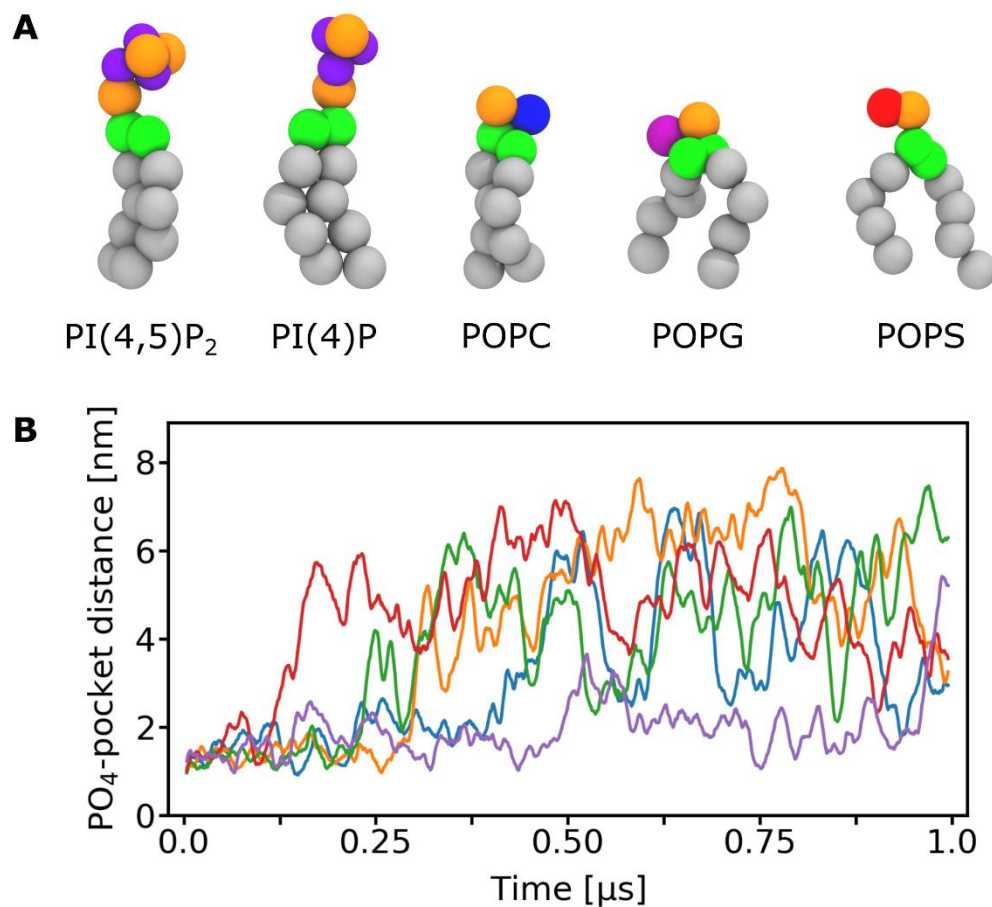

**Fig. S1. Binding of a TubbyCT to a single PI(4,5)P<sub>2</sub> lipid embedded in a negatively charged membrane.** (a) Representative snapshots of the different lipids employed in this work. The spheres depict the size of the CG beads based on their non-bonded Lennard-Jones interactions. Colors are as follows: inositol ring – purple; phosphate – orange; glycerol linker – green; aliphatic tails – grey; choline – blue; glycerol head group – magenta; serine – red. (b) Control simulations of tubbyCT bound to one PI(4,5)P<sub>2</sub> lipid embedded in a POPC membrane containing 5 mol% POPG (5×1 μs) with a doubly negatively charged headgroup. Therefore, the glycine moiety was considered being deprotonated and represented by a regular Qn bead with a charge of -1.

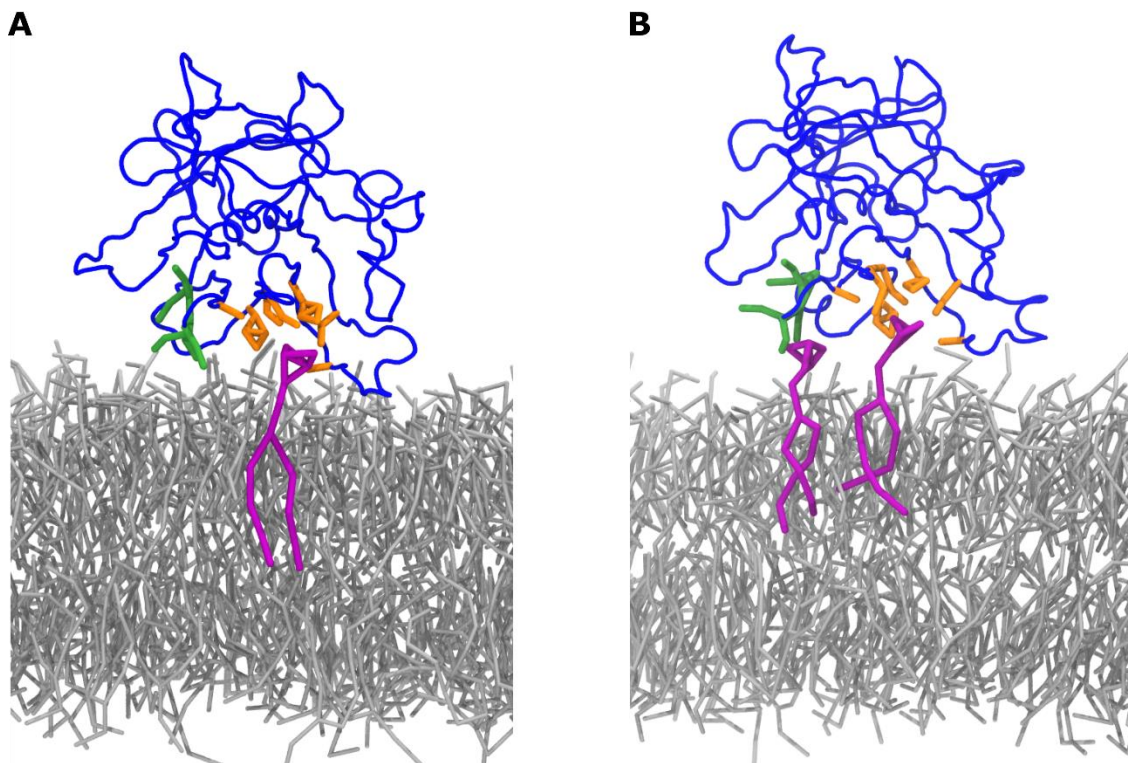

**Fig. S2. Exemplary snapshots of tubbyCT binding to one and two PI(4,5)P<sub>2</sub> lipids, respectively.** (a) TubbyCT binding to one PI(4,5)P<sub>2</sub>. The snapshot was taken from the umbrella sampling window at the distance of the PMF minimum of 1.9 nm. The colors are: backbone of TubbyCT – blue; residues of the canonical binding site – orange; residues of the novel binding site – green; PI(4,5)P<sub>2</sub> – purple; POPC – grey. (b) TubbyCT binding to two PI(4,5)P<sub>2</sub>. The snapshot was taken from the umbrella sampling window at the distance of the PMF minimum of 1.7 nm. Colors are the same as in (a).

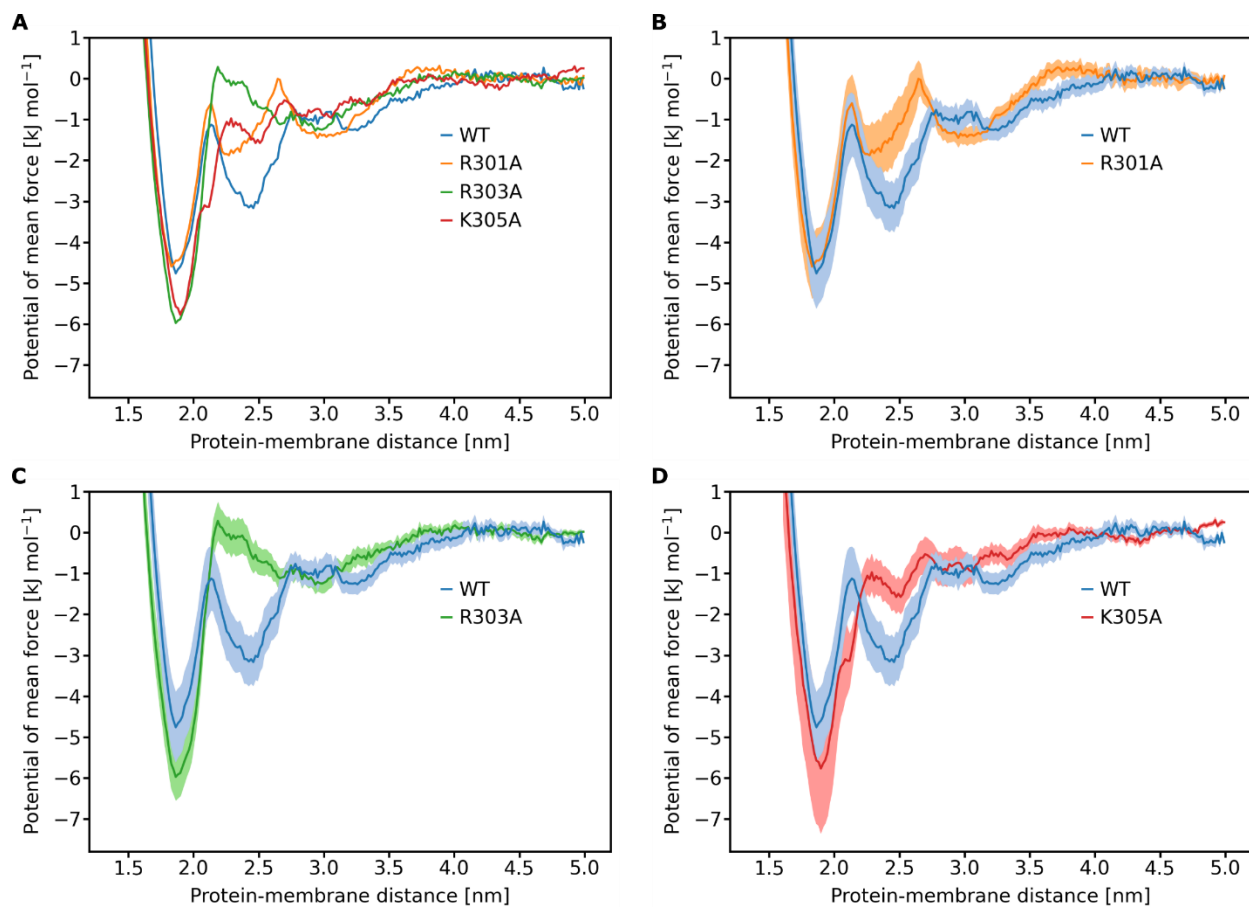

**Fig. S3. PMFs for mutational analysis of the novel second binding site.** (a) PMFs for the  $\text{PI}(4,5)\text{P}_2$  binding of tubbyCT WT (blue) as well as the mutants R301A (orange), R303A (green), and K305A (red). The error bars are omitted for clarity here, but they are included in the one-to-one comparison between WT and the respective mutants (b–d). (b) PMF for the  $\text{PI}(4,5)\text{P}_2$  binding of tubbyCT WT and R301A. For completeness, we included the R301A mutant in the comparison (see also Fig. 4d in the manuscript). (c) PMF for the  $\text{PI}(4,5)\text{P}_2$  binding of tubbyCT WT and R303A. (d) PMF for the  $\text{PI}(4,5)\text{P}_2$  binding of tubbyCT WT and K305A.

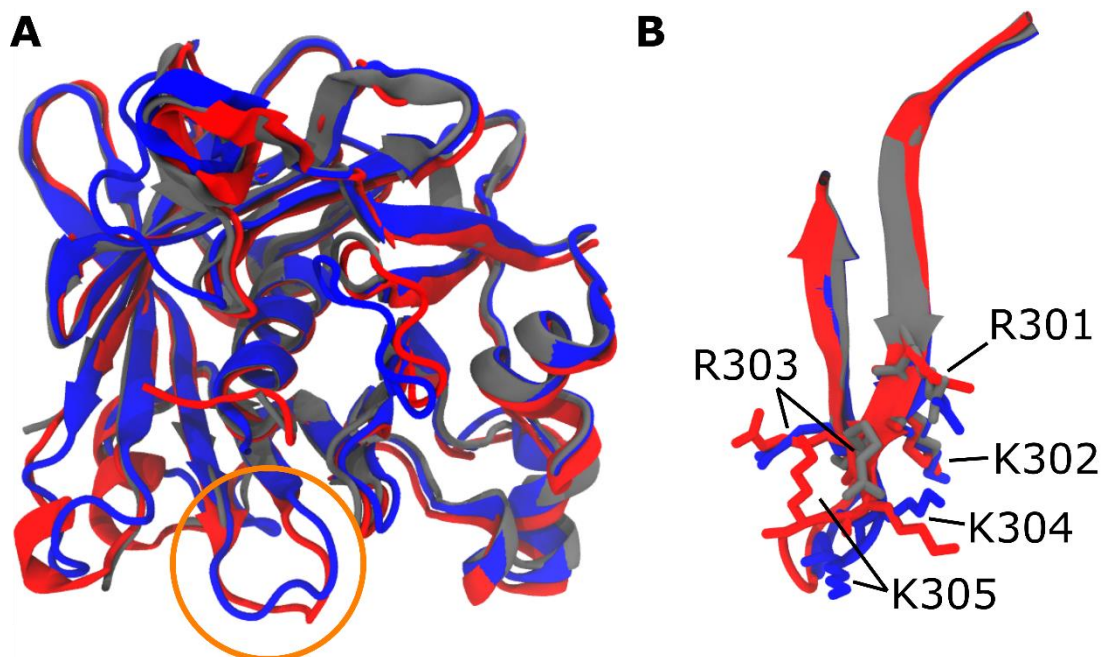

**Fig. S4. Comparison of structural models for tubbyCT.** (a) Overlay of the crystal structure of tubbyCT (grey, pdb code: 1I7E) with the model obtained from the I-TASSER server (blue) (ref. 50 of the main text) used as template for the missing loops here and the model obtained from AlphaFold (red) (ref. 56, 57 of the main text). The orange circle highlights the loop with the novel second PI(4,5)P<sub>2</sub> binding site. The structure alignment was performed based on the C $\alpha$  positions and included all residues resolved in the crystal structure. (b) Comparison of the side chain orientations of the residues 301–305 of the novel second binding site between the three structures. Note that bonds in the G $\bar{o}$ -like model were only added between residues resolved in the crystal structure.

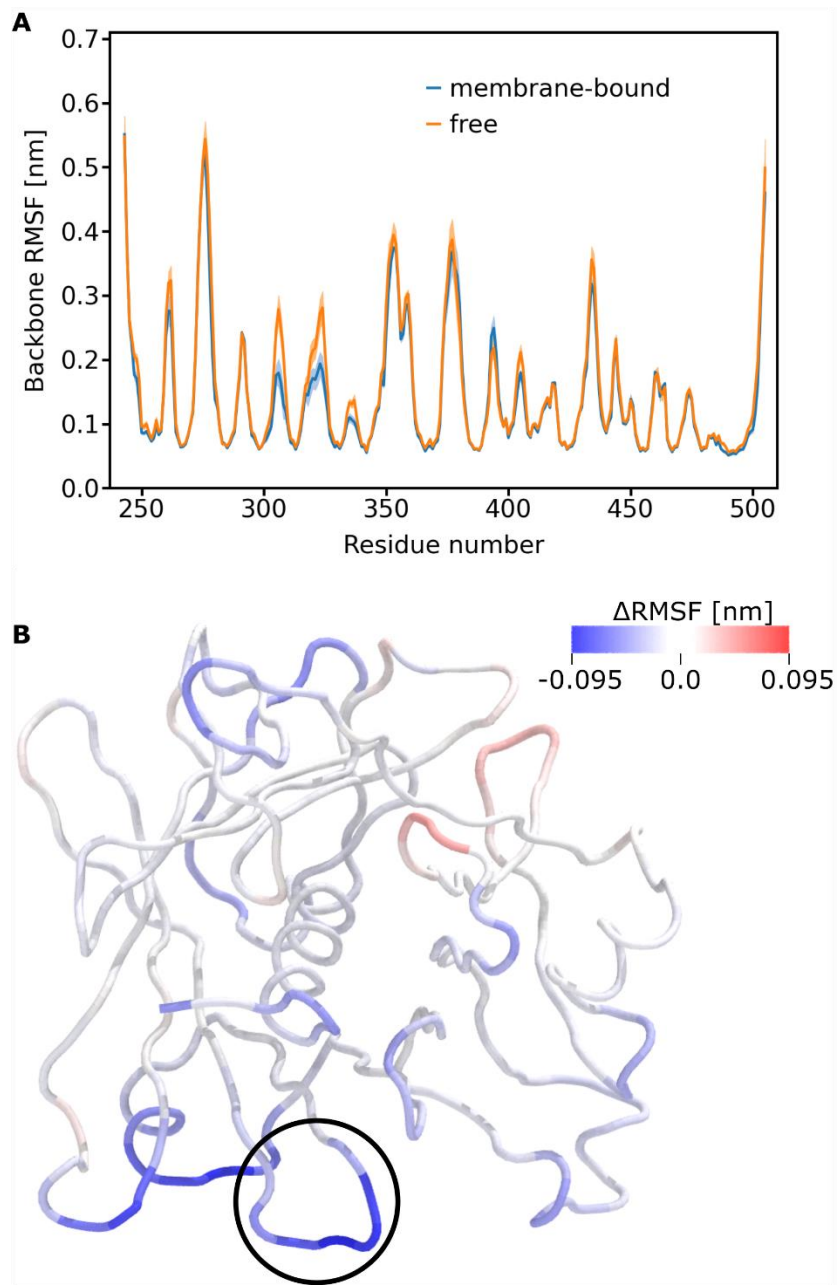

**Fig. S5. Root mean square fluctuations (RMSF) of tubbyCT.** (a) RMSF of the backbone beads of membrane-bound (5 mol% PI(4,5)P<sub>2</sub>, blue) and free tubbyCT (orange). Darker lines depict the average of 10 windows of 500 ns each; shaded areas depict the standard error. (b)  $\Delta$ RMSF between membrane-bound and free tubbyCT mapped on the modeled structure. Blue areas indicate reduced fluctuations upon membrane binding; red areas indicate increased fluctuations. The black circle highlights the loop with the novel second PI(4,5)P<sub>2</sub> binding site.

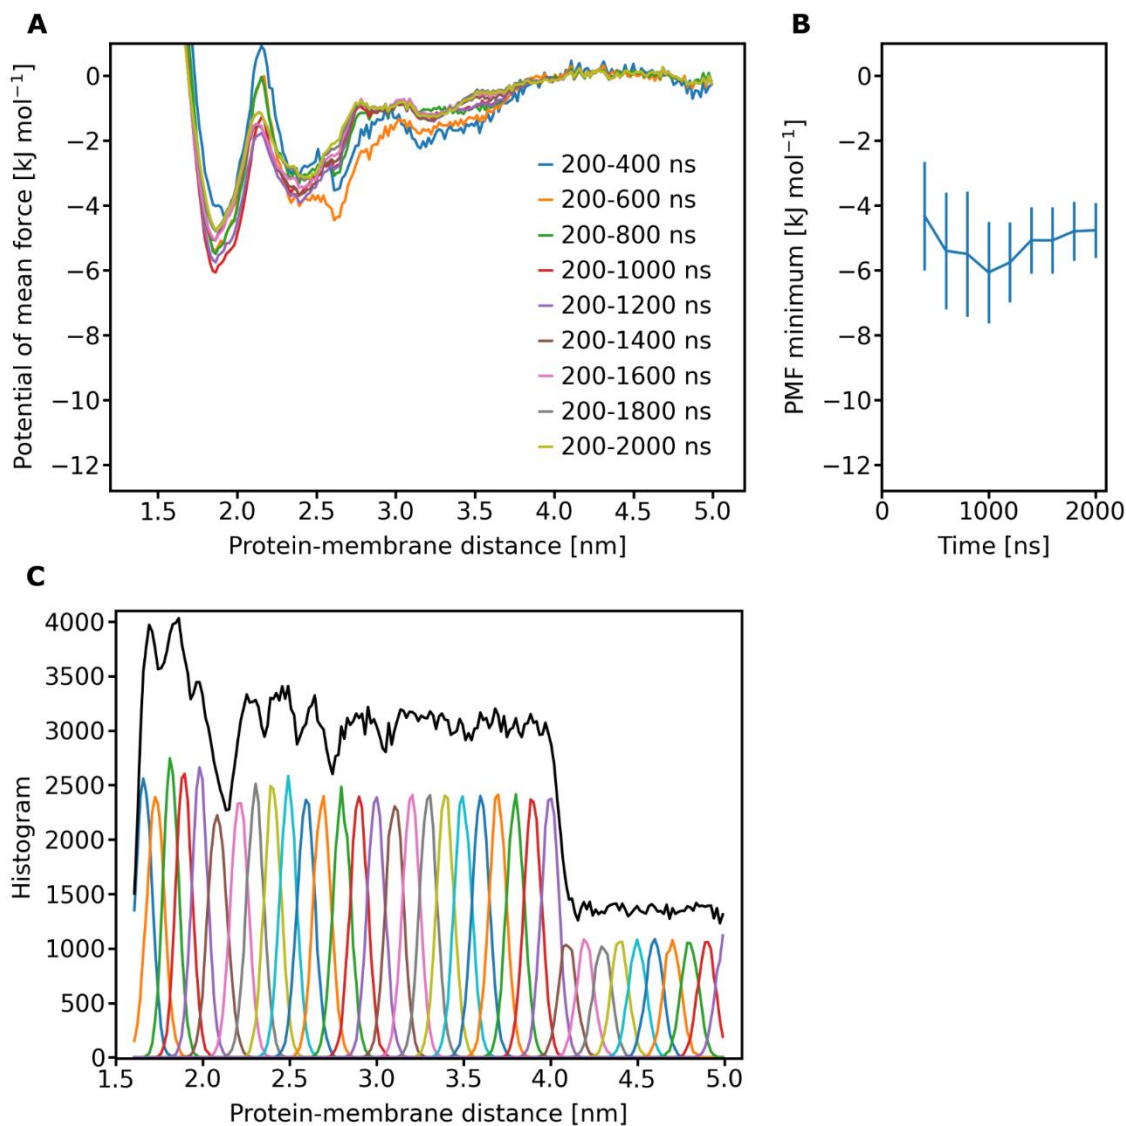

**Fig. S6. Convergence analysis of the PMF calculation for tubbyCT binding to one PI(4,5)P<sub>2</sub> lipid.** (a) PMFs calculated for different time windows from 200–400 ns to 200–2000 ns in steps of 200 ns. The initial 200 ns of each window were discarded to allow the system to equilibrate. The PMF of the final time interval of 200–2000 ns is used for further analysis. Note that for windows centered at distances  $\geq 4.1$  nm, the simulation time was 1  $\mu\text{s}$  instead of 2  $\mu\text{s}$ . (b) Energy minima from the time windows in (a) including the respective error bars. (c) Histograms of the umbrella windows (colored lines) analyzed by the *gmx wham* tool. The black line depicts the sum of the analyzed histograms.



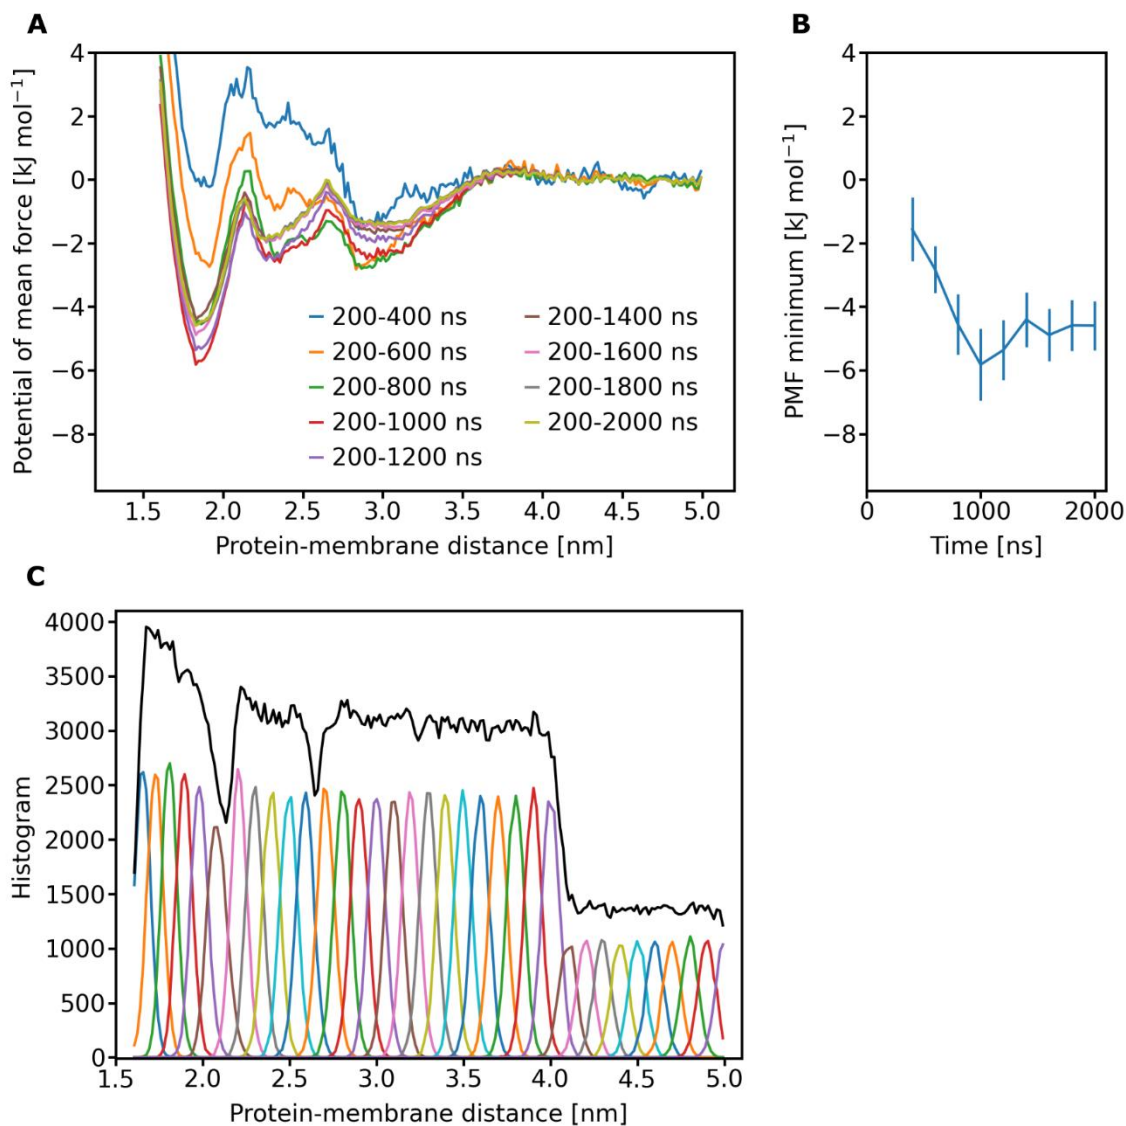

**Fig. S7. Convergence analysis of the PMF calculation for R301A tubbyCT binding to one PI(4,5)P<sub>2</sub> lipid.** (a) PMFs calculated for different time windows from 200–400 ns to 200–2000 ns in steps of 200 ns. The initial 200 ns of each window were discarded to allow the system to equilibrate. The PMF of the final time interval of 200–2000 ns is used for further analysis. Note that for windows centered at distances  $\geq 4.1$  nm, the simulation time was 1  $\mu\text{s}$  instead of 2  $\mu\text{s}$ . (b) Energy minima from the time windows in (a) including the respective error bars. (c) Histograms of the umbrella windows (colored lines) analyzed by the *gmx wham* tool. The black line depicts the sum of the analyzed histograms.

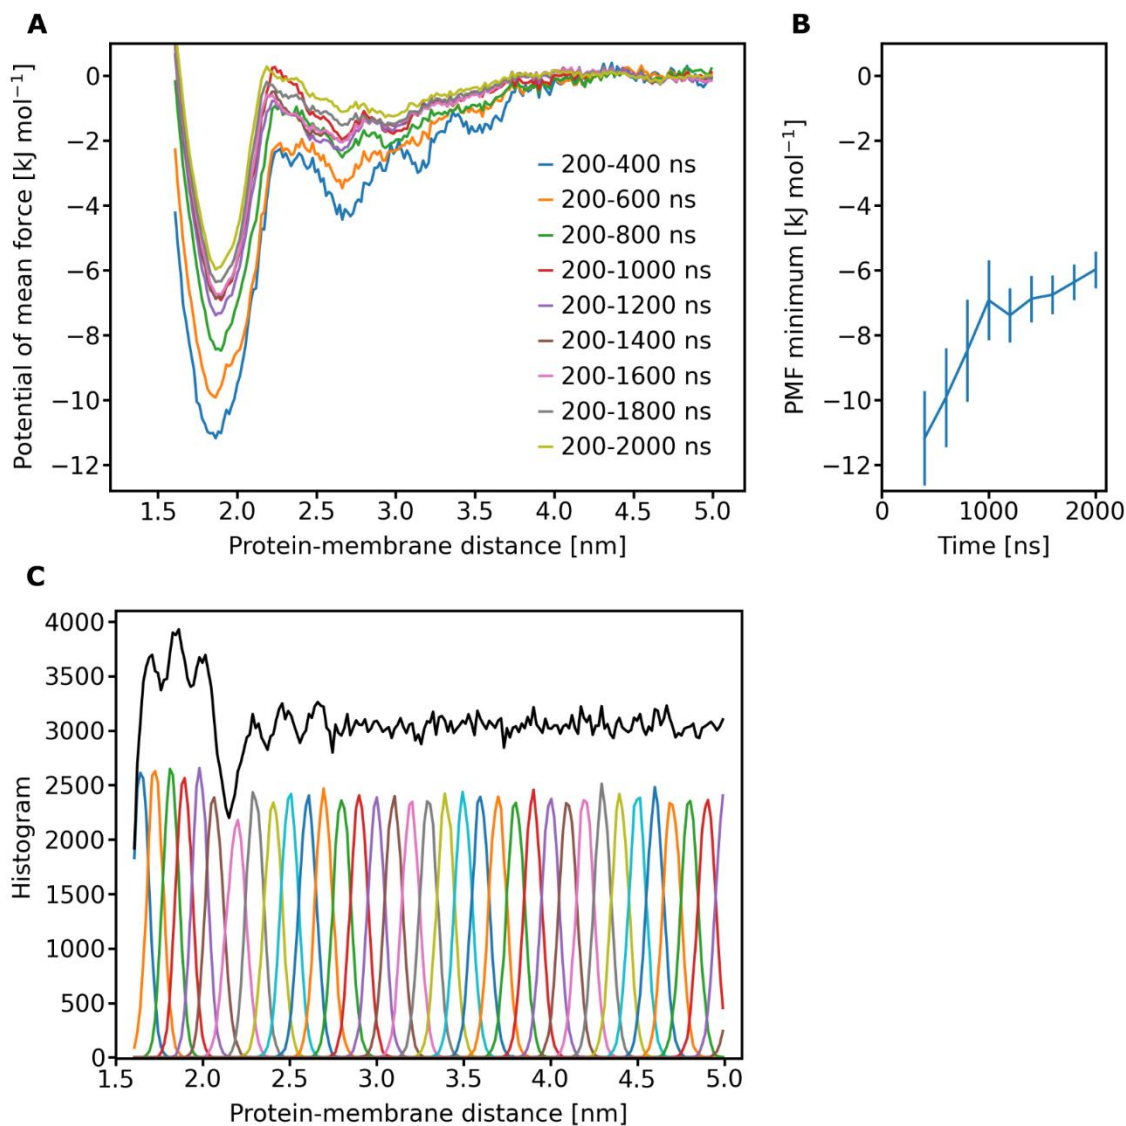

**Fig. S8. Convergence analysis of the PMF calculation for R303A tubbyCT binding to one PI(4,5)P<sub>2</sub> lipid.** (a) PMFs calculated for different time windows from 200–400 ns to 200–2000 ns in steps of 200 ns. The initial 200 ns of each window were discarded to allow the system to equilibrate. The PMF of the final time interval of 200–2000 ns is used for further analysis. (b) Energy minima from the time windows in (a) including the respective error bars. (c) Histograms of the umbrella windows (colored lines) analyzed by the *gmx wham* tool. The black line depicts the sum of the analyzed histograms.

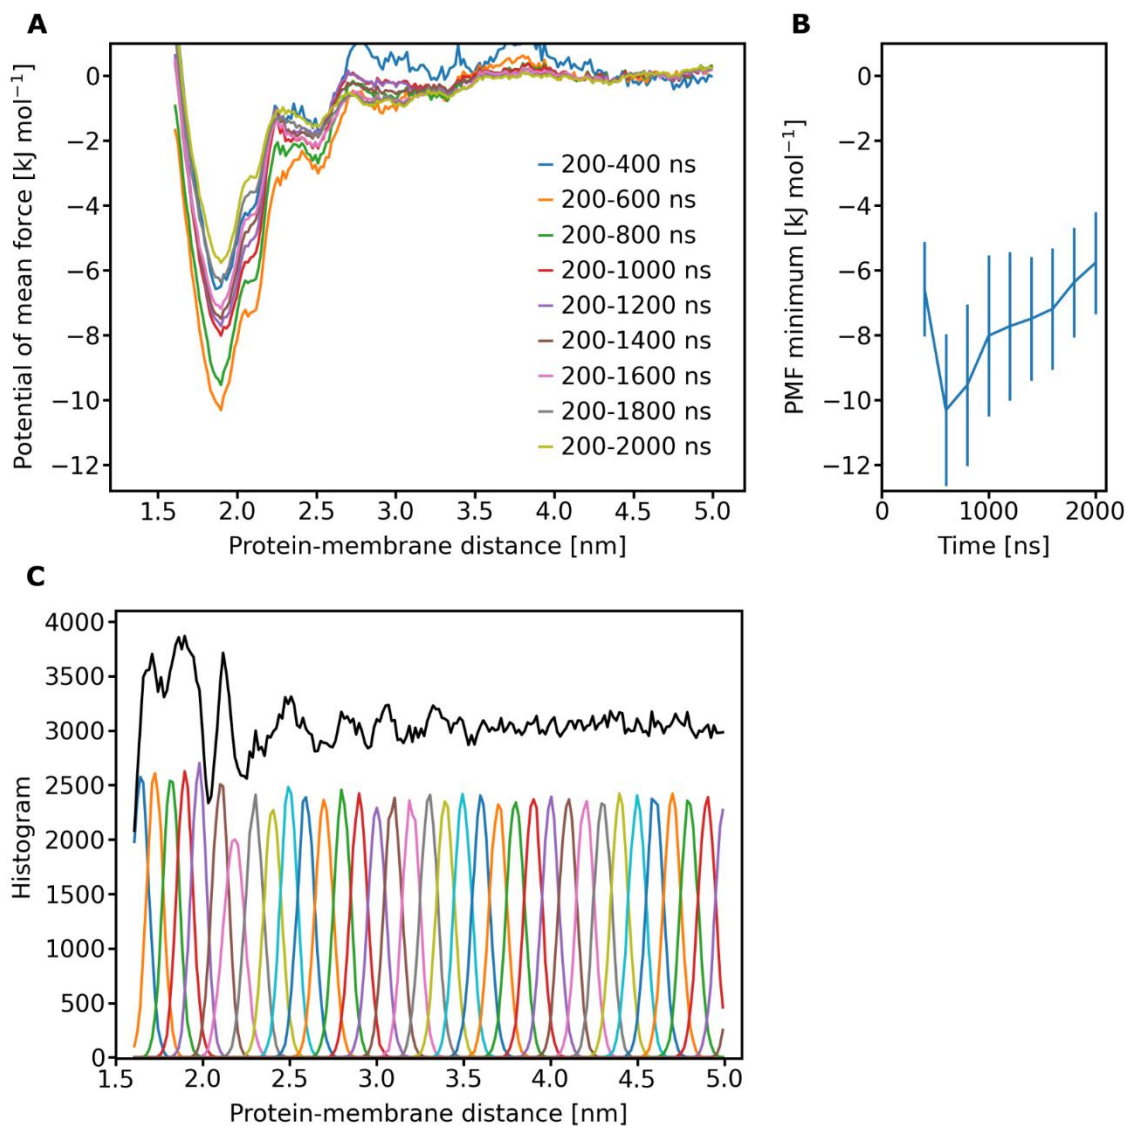

**Fig. S9. Convergence analysis of the PMF calculation for K305A tubbyCT binding to one PI(4,5)P<sub>2</sub> lipid.** (a) PMFs calculated for different time windows from 200–400 ns to 200–2000 ns in steps of 200 ns. The initial 200 ns of each window were discarded to allow the system to equilibrate. The PMF of the final time interval of 200–2000 ns is used for further analysis. (b) Energy minima from the time windows in (a) including the respective error bars. (c) Histograms of the umbrella windows (colored lines) analyzed by the *gmx wham* tool. The black line depicts the sum of the analyzed histograms.

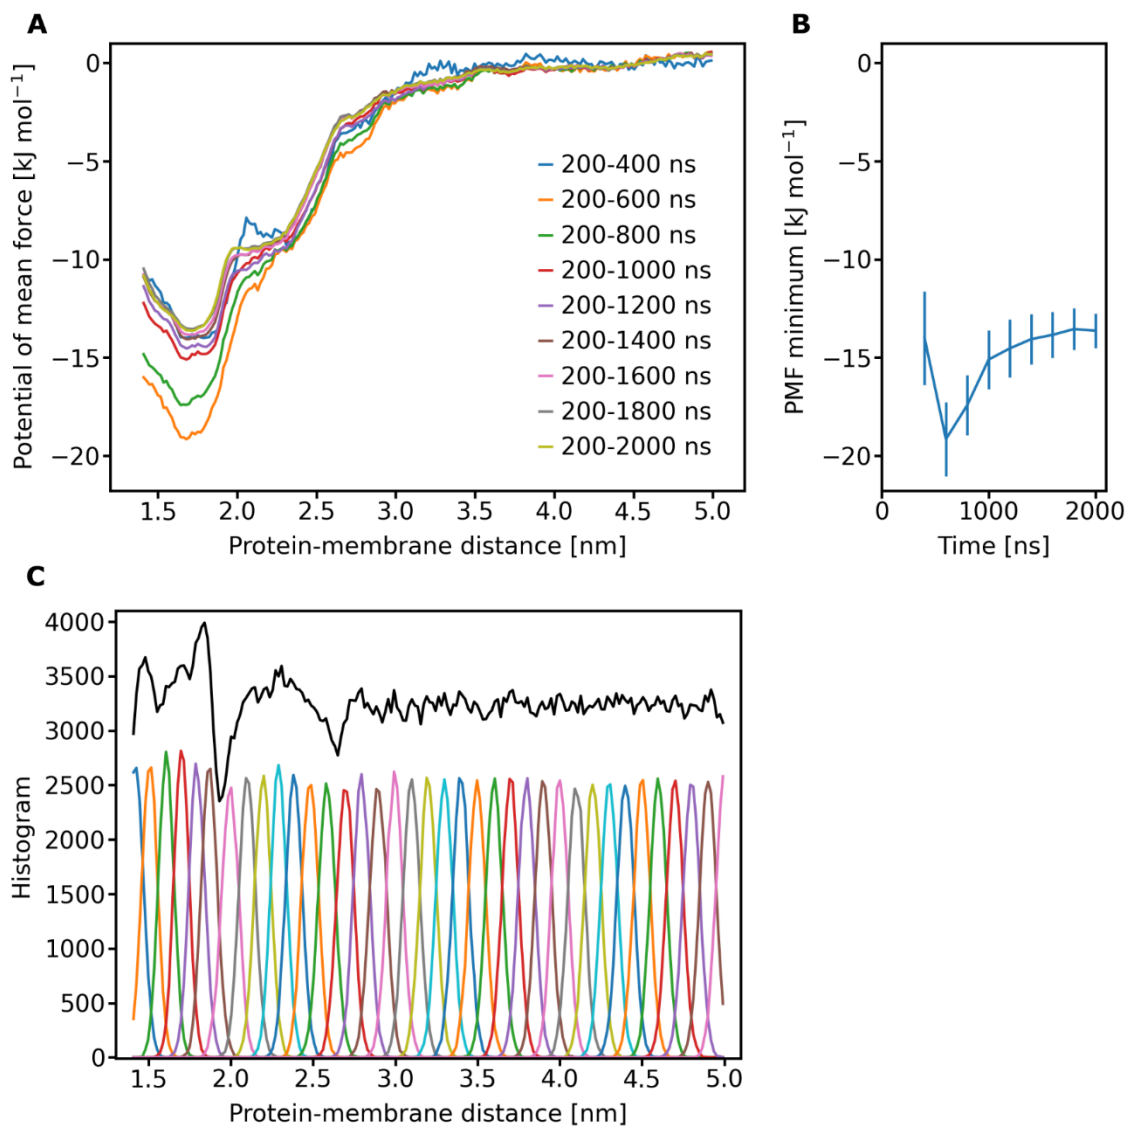

**Fig. S10. Convergence analysis of the PMF calculation for tubbyCT binding to two PI(4,5)P<sub>2</sub> lipids.** (a) PMFs calculated for different time windows from 200–400 ns to 200–2000 ns in steps of 200 ns. The initial 200 ns of each window were discarded to allow the system to equilibrate. The PMF of the final time interval of 200–2000 ns is used for further analysis. (b) Energy minima from the time windows in (a) including the respective error bars. (c) Histograms of the umbrella windows (colored lines) analyzed by the *gmx wham* tool. The black line depicts the sum of the analyzed histograms.

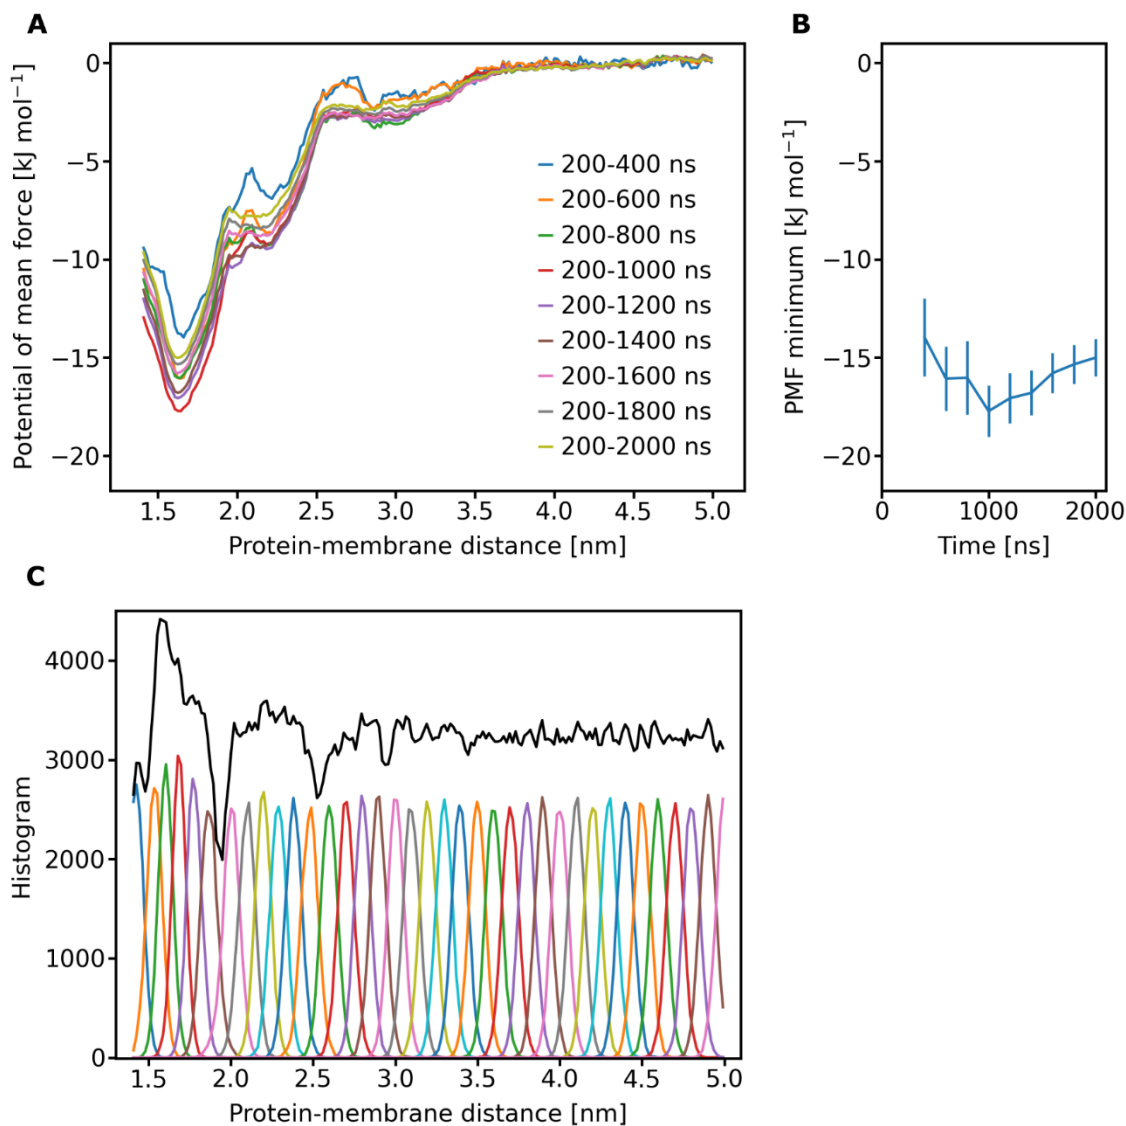

**Fig. S11. Convergence analysis of the PMF calculation for R301A tubbyCT binding to two PI(4,5)P<sub>2</sub> lipids.** (a) PMFs calculated for different time windows from 200–400 ns to 200–2000 ns in steps of 200 ns. The initial 200 ns of each window were discarded to allow the system to equilibrate. The PMF of the final time interval of 200–2000 ns is used for further analysis. (b) Energy minima from the time windows in (a) including the respective error bars. (c) Histograms of the umbrella windows (colored lines) analyzed by the *gmx wham* tool. The black line depicts the sum of the analyzed histograms.

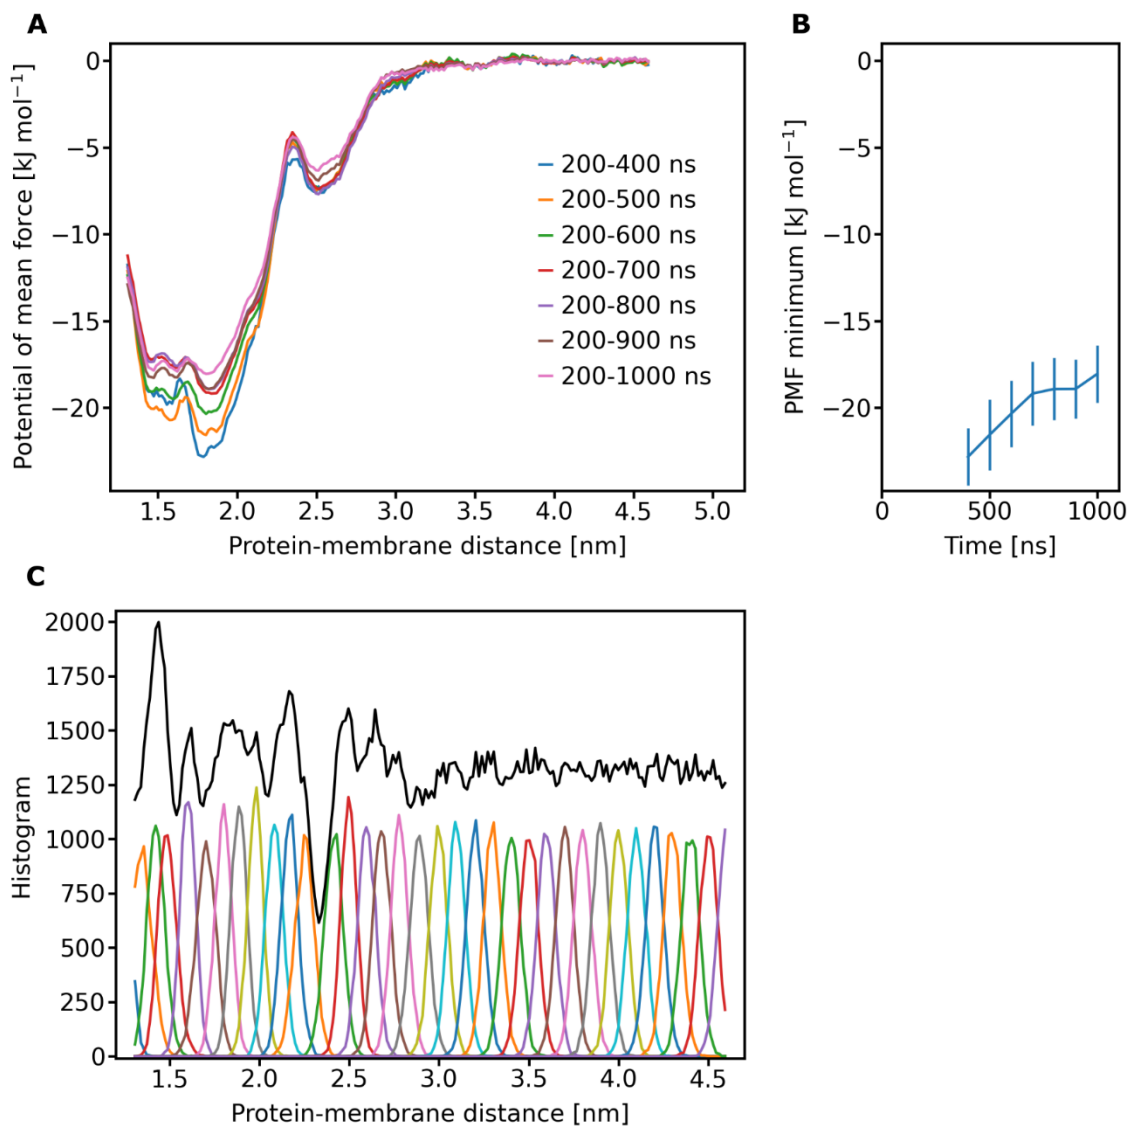

**Fig. S12. Convergence analysis of the PMF calculation for PLC- $\delta$ 1 PH domain to one PI(4,5)P<sub>2</sub> lipid.** (a) PMFs calculated for different time windows from 200–400 ns to 200–1000 ns in steps of 100 ns. The initial 200 ns of each window were discarded to allow the system to equilibrate. The PMF of the final time interval of 200–1000 ns is used for further analysis. (b) Energy minima from the time windows in (a) including the respective error bars. (c) Histograms of the umbrella windows (colored lines) analyzed by the *gmx wham* tool. The black line depicts the sum of the analyzed histograms.

**Table S1.**

Changes of the CG bead types to adapt the CG models of PI(4,5)P<sub>2</sub> and PI(4)P from Martini 2 to the open-beta version of Martini 3. Bonded terms were kept unchanged.

| PI(4,5)P <sub>2</sub> |           |                     |                               | PI(4)P |           |                     |                               |
|-----------------------|-----------|---------------------|-------------------------------|--------|-----------|---------------------|-------------------------------|
| id                    | bead name | bead type Martini 2 | bead type open-beta Martini 3 | id     | bead name | bead type Martini 2 | bead type open-beta Martini 3 |
| 1                     | C1        | P1                  | SP1                           | 1      | C1        | P1                  | SP1                           |
| 2                     | C2        | P1                  | SP1                           | 2      | C2        | P1                  | SP1                           |
| 3                     | C3        | P1                  | SP1                           | 3      | C3        | P4                  | SP3                           |
| 4                     | PO4       | Qa                  | Q1                            | 4      | PO4       | Qa                  | Q1                            |
| 5                     | P4        | Qa                  | Q2                            | 5      | P4        | Qa                  | Q2                            |
| 6                     | P5        | Qa                  | Q2                            | 6      | GL1       | Na                  | N2a                           |
| 7                     | GL1       | Na                  | N2a                           | 7      | GL2       | Na                  | N2a                           |
| 8                     | GL2       | Na                  | N2a                           | 8      | C1A       | C1                  | C1                            |
| 9                     | C1A       | C1                  | C1                            | 9      | D2A       | C3                  | C3                            |
| 10                    | D2A       | C3                  | C3                            | 10     | C3A       | C1                  | C1                            |
| 11                    | C3A       | C1                  | C1                            | 11     | C4A       | C1                  | C1                            |
| 12                    | C4A       | C1                  | C1                            | 12     | C1B       | C1                  | C1                            |
| 13                    | C1B       | C1                  | C1                            | 13     | C2B       | C1                  | C1                            |
| 14                    | C2B       | C1                  | C1                            | 14     | C3B       | C1                  | C1                            |
| 15                    | C3B       | C1                  | C1                            | 15     | C4B       | C1                  | C1                            |
| 16                    | C4B       | C1                  | C1                            |        |           |                     |                               |

**Table S2.**

List of abbreviations used in the manuscript.

| Abbreviation          | Expression                                             |
|-----------------------|--------------------------------------------------------|
| ARNO                  | ADP-Ribosylation factor Nucleotide-binding site Opener |
| ASAP                  | ASter-Associated Protein                               |
| CG                    | Coarse-Grained                                         |
| CHO                   | Chinese Hamster Ovary                                  |
| DAG                   | Diacylglycerol                                         |
| ENTH                  | Epsin N-Terminal Homology                              |
| ER                    | Endoplasmic Reticulum                                  |
| E-Syt                 | Extended Synaptotagmin                                 |
| FYVE                  | Fab1, YOTB, Vac1, EEA1                                 |
| GFP                   | Green Fluorescent Protein                              |
| GPCR                  | G Protein-Coupled Receptor                             |
| GRP                   | General Receptor for Phosphoinositides                 |
| IIFT-A                | Intraflagellar Transport complex A                     |
| IP <sub>3</sub>       | Inositol-(1,4,5)-trisphosphate                         |
| MD                    | Molecular Dynamics                                     |
| PG                    | Phosphatidylglycerol                                   |
| PH                    | Pleckstrin Homology                                    |
| PI                    | Phosphoinositide                                       |
| PI(4)P                | Phosphatidylinositol-4-phosphate                       |
| PI(4,5)P <sub>2</sub> | Phosphatidylinositol-(4,5)-bisphosphate                |
| PIP <sub>3</sub>      | Phosphatidylinositol-(3,4,5)-trisphosphate             |
| PLC                   | Phospholipase C                                        |
| PM                    | Plasma Membrane                                        |
| PMF                   | Potential of Mean Force                                |
| POPC                  | 1-palmitoyl-2-oleoyl-sn-glycero-3-phosphocholine       |
| POPG                  | 1-palmitoyl-2-oleoyl-sn-glycero-3-phosphoglycerol      |
| POPS                  | 1-palmitoyl-2-oleoyl-sn-glycero-3-phosphoserine        |
| PS                    | Phosphatidylserine                                     |
| PX                    | Phox                                                   |
| RFP                   | Red Fluorescent Protein                                |
| RMSF                  | Root Mean Square Fluctuations                          |
| SEM                   | Standard Error of the Mean                             |
| TIRF-M                | Total Internal Reflection Fluorescence Microscopy      |
| tubbyCT               | C-terminal domain of tubby                             |
| TULP                  | Tubby-Like Protein                                     |
| VSP                   | Voltage-Sensitive Phosphatase                          |
| WT                    | Wild Type                                              |



**Table S3.**

Mutagenesis primers for the characterized tubbyCT mutants.

| Mutation                   | Forward primer                   | Reverse primer                  |
|----------------------------|----------------------------------|---------------------------------|
| R301A                      | cctcctggcgggcggaagagaaagaagag    | ctcttctttctcttcgcgcccgcaggagg   |
| R303A                      | cctggcgggcaggaaggcaagaagagtaaac  | gttttactcttttccttctgcccgcagg    |
| K304A                      | gcgggcaggaagagagcgaagagtaaaactcc | ggaagtttactcttcgctctcttctgcccgc |
| K305A                      | cgggcaggaagagaaaggcgagtaaaactcc  | ggaagtttactcgcttctcttctgcccgc   |
| R301A K304A                | gcgggcggaagagagcgaagagtaaaactcc  | ggaagtttactcttcgctctcttctgcccgc |
| R303A K305A                | gcgggcaggaaggcaaggcgagtaaaactcc  | ggaagtttactcgcttctgcttctgcccgc  |
| R303A K304A<br>K305A       | gcgggcaggaaggcagcggcgagtaaaactcc | ggaagtttactcgccgctgcttctgcccgc  |
| R301A R303A<br>K304A K305A | gcgggcggaaggcagcggcgagtaaaactcc  | ggaagtttactcgccgctgcttctgcccgc  |
